# Supplementary material for: Effects of stresses on the thermoelectric properties of In4Se3
Source: Royal Society of Chemistry journal article supplement (doi:10.1039/d3tc04092e), 2024-01-01
Supplement: d3tc04092e1.pdf [file d3tc04092e1.pdf]

## Supplementary information

### Effect of stresses on the thermoelectric properties of $\text{In}_4\text{Se}_3$

**Weiguo Xu<sup>a,1</sup>, Quan Liu<sup>a,1</sup>, Xin Zhou<sup>a</sup>, Jianfeng Lin<sup>a</sup>, Shiquan Lin<sup>a</sup>, Mi lu<sup>a</sup>,  
Jianping Lin<sup>\*,a</sup>**

*Mr. Weiguo Xu, School of Materials School of Materials Science and Engineering,  
Xiamen University of Technology, Xiamen 361024, China, [122909695@qq.com](mailto:122909695@qq.com)*

*Mr. Quan Liu, School of Materials School of Materials Science and Engineering,  
Xiamen University of Technology, Xiamen 361024, China, [lq13821296920@163.com](mailto:lq13821296920@163.com)*

*Mr. Xin Zhou, School of Materials School of Materials Science and Engineering,  
Xiamen University of Technology, Xiamen 361024, China, [zhouxingzyx@163.com](mailto:zhouxingzyx@163.com)*

*Mr. Jianfeng Lin, School of Materials School of Materials Science and Engineering,  
Xiamen University of Technology, Xiamen 361024, China, [1191169110@qq.com](mailto:1191169110@qq.com)*

*Mr. Shiquan Lin, School of Materials School of Materials Science and Engineering,  
Xiamen University of Technology, Xiamen 361024, China, [2059152176@qq.com](mailto:2059152176@qq.com)*

*Mr. Mi Lu, School of Materials School of Materials Science and Engineering, Xiamen  
University of Technology, Xiamen 361024, China, [2013113202@xmut.edu.cn](mailto:2013113202@xmut.edu.cn)*

*Mr. Jianping Lin, School of Materials School of Materials Science and Engineering,  
Xiamen University of Technology, Xiamen 361024, China, [jplin@xmut.edu.cn](mailto:jplin@xmut.edu.cn)*

<sup>a</sup> Fujian Provincial Key Laboratory of Functional Materials and Applications, School of Materials  
School of Materials Science and Engineering, Xiamen University of Technology, Xiamen 361024,  
China

---

\* Corresponding author.

<sup>1</sup> These authors contributed equally to this work.

E-Mail: [jplin@xmut.edu.cn](mailto:jplin@xmut.edu.cn)

**Table S1.** Calculated lattice constants of  $\text{In}_4\text{Se}_3$  at different Stresses

| Stresses(GPa) | a=(Å)  | b=(Å)  | c=(Å) | V=(Å <sup>3</sup> ) | $\alpha$ =(°) | $\beta$ =(°) | $\gamma$ =(°) |
|---------------|--------|--------|-------|---------------------|---------------|--------------|---------------|
| -2            | 29.655 | 23.874 | 7.613 | 5391.70             | 90            | 90           | 90            |
| -1            | 16.373 | 12.767 | 4.185 | 874.81              | 90            | 90           | 90            |
| 0             | 15.605 | 12.563 | 4.162 | 815.94              | 90            | 90           | 90            |
| 1             | 15.377 | 12.438 | 4.150 | 793.73              | 90            | 90           | 90            |
| 2             | 15.114 | 12.319 | 4.134 | 769.71              | 90            | 90           | 90            |
| 3             | 14.929 | 12.225 | 4.115 | 751.06              | 90            | 90           | 90            |
| 4             | 14.759 | 12.142 | 4.098 | 734.45              | 90            | 90           | 90            |
| 5             | 14.632 | 12.064 | 4.081 | 720.46              | 90            | 90           | 90            |

**Table S2.** Calculated elastic constants of  $\text{In}_4\text{Se}_3$  at different Stresses

| Stresses(GPa) | $C_{11}$ | $C_{12}$ | $C_{13}$ | $C_{22}$ | $C_{23}$ | $C_{33}$ | $C_{44}$ | $C_{55}$ | $C_{66}$ |
|---------------|----------|----------|----------|----------|----------|----------|----------|----------|----------|
| -1            | 7.7      | 5.5      | 13.3     | 32.2     | 7.2      | 45.3     | 9.0      | 9.9      | 9.3      |
| 0             | 30.1     | 13.6     | 22.8     | 50.9     | 13.3     | 57.6     | 12.6     | 19.9     | 14.6     |
| 1             | 36.7     | 17.4     | 27.7     | 58.7     | 17.3     | 61.1     | 15.3     | 25.5     | 16.3     |
| 2             | 45.1     | 21.9     | 33.5     | 67.6     | 21.7     | 66.7     | 16.3     | 28.6     | 17.9     |
| 3             | 54.2     | 24.9     | 37.2     | 74.4     | 26.4     | 72.1     | 17.6     | 33.5     | 20.2     |
| 4             | 60.5     | 27.9     | 42.3     | 82.6     | 28.9     | 78.4     | 21.8     | 35.8     | 22.5     |
| 5             | 67.6     | 31.6     | 46.6     | 87.7     | 33.1     | 82.7     | 23.0     | 38.3     | 22.9     |

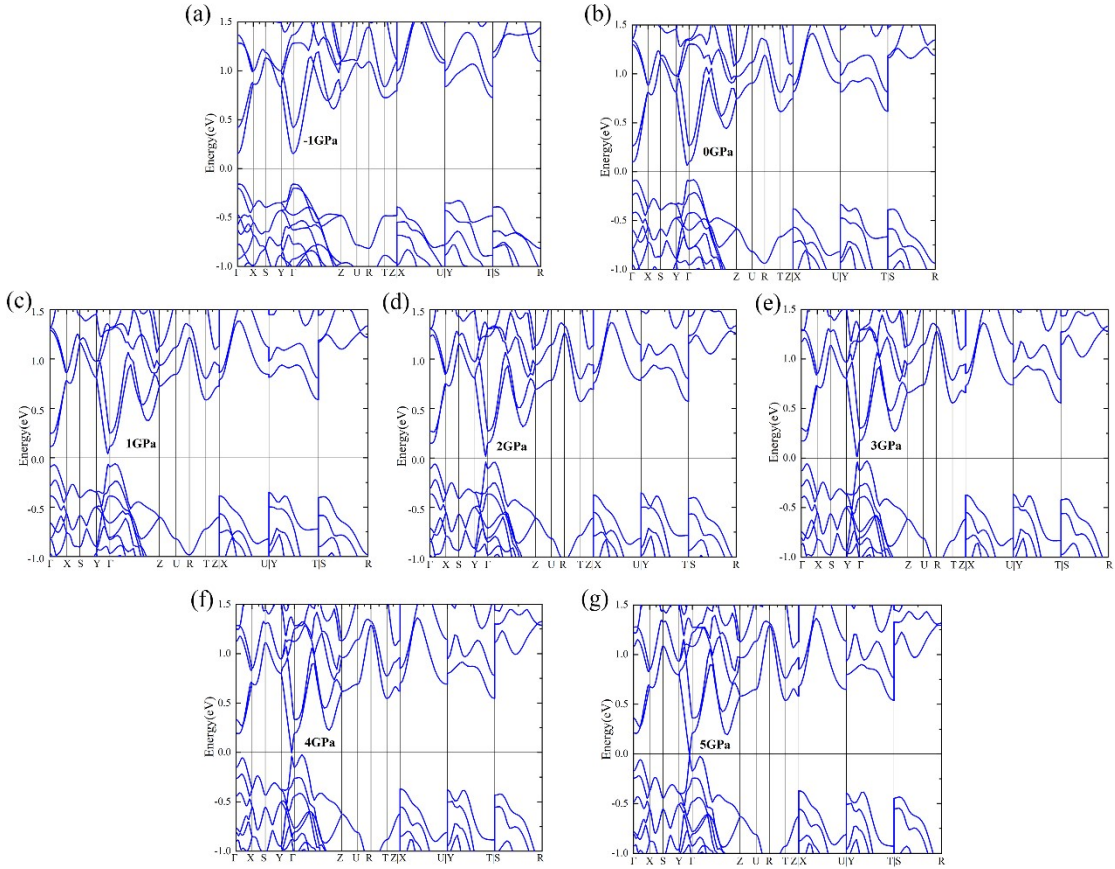**Fig. S1.** Variation of the electronic band structure in the PBE potential with stresses.

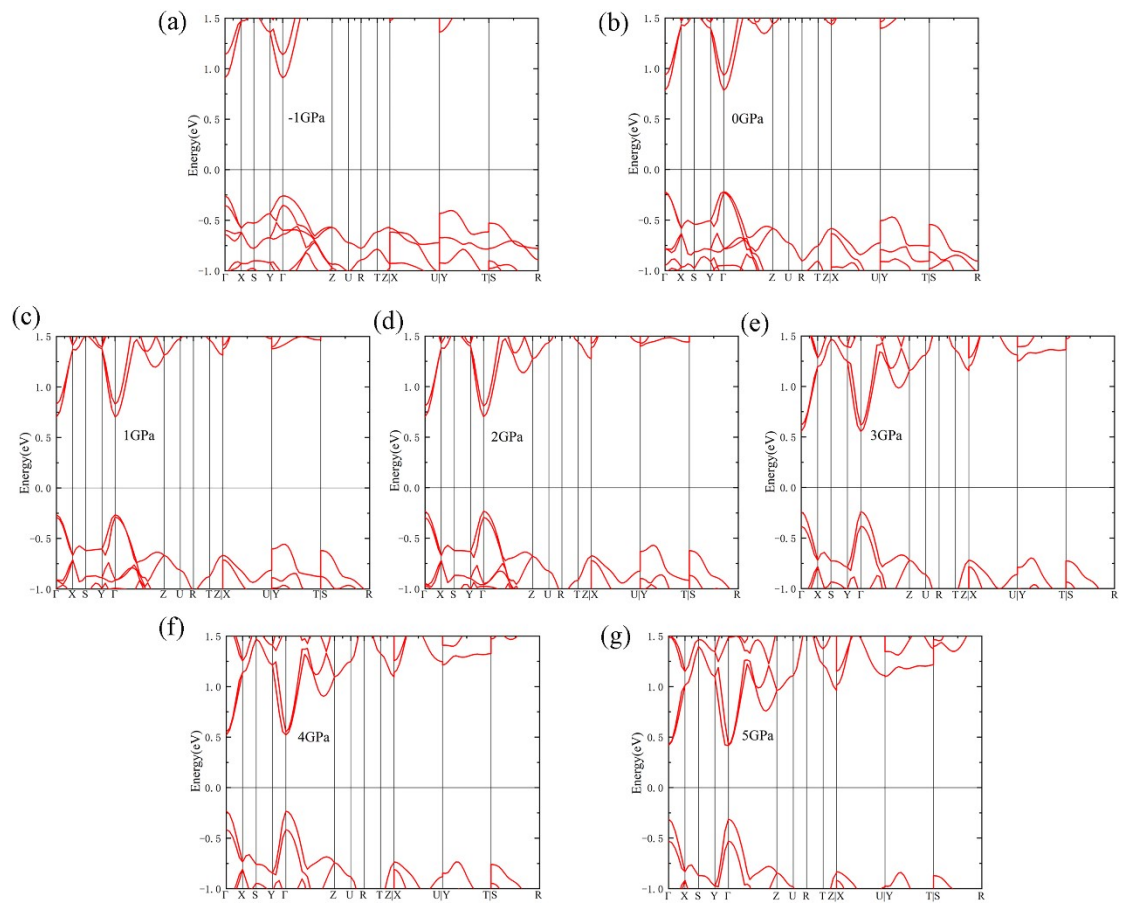

**Fig. S2.** Variation of the electronic band structure in the HSE06 potential with stresses.

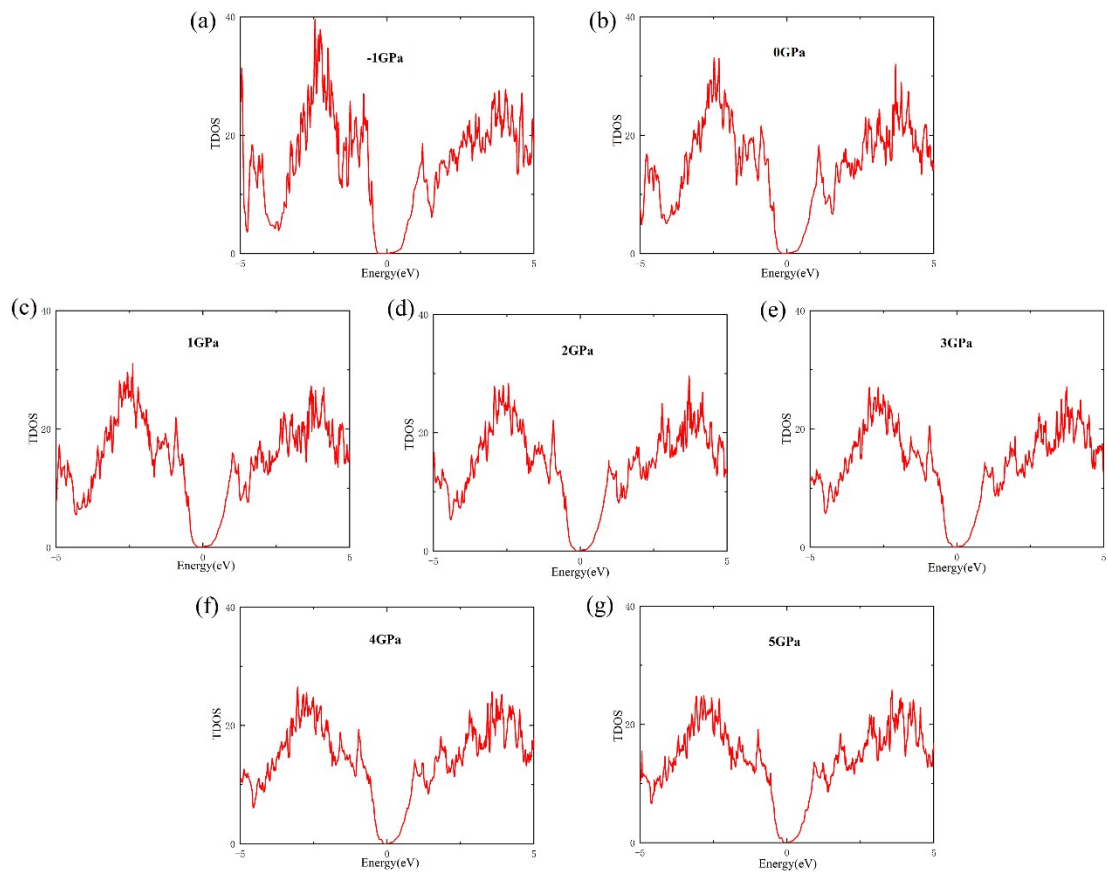

**Fig. S3.** Variation of the total density of states in the PBE potential with stresses.
